# Supplementary material for: Early Incorporation to Palliative Care (EPC) in Patients With Advanced Non-Small Cell Lung Cancer: The PACO Randomized Clinical Trial
Source: PubMed Central journal article supplement (PMC11449095; doi:10.1093/oncolo/oyae050), 2024-04-01
Supplement: oyae050_suppl_supplementary_tables_1-5.pdf [file oyae050_suppl_supplementary_tables_1-5.pdf]

**Supplementary Table 1.** Health-related quality of life among patients with a good performance status (ECOG 0-1)

| Health related quality of life | n  | C<br>(mean ± DE) | n  | EPC<br>(mean ± DE) | Mean difference<br>(95% CI) | p<br><small>(t student)</small> |
|--------------------------------|----|------------------|----|--------------------|-----------------------------|---------------------------------|
| <b>Global health status</b>    |    |                  |    |                    |                             |                                 |
| Baseline                       | 53 | 46.6 ± 26.3      | 59 | 59.0 ± 24.4        | 12.3 (2.8 – 21.8)           | <b>0.011</b>                    |
| 2 cycles                       | 33 | 60.3 ± 22.1      | 45 | 60.9 ± 26.6        |                             |                                 |
| 4 cycles                       | 32 | 54.9 ± 23.9      | 41 | 63.0 ± 25.4        |                             |                                 |
| 6 cycles                       | 28 | 54.7 ± 25.2      | 37 | 57.4 ± 25.3        | 2.6 (-10.0 – 15.3)          | 0.675                           |
| P Baseline - 6 cycles          |    | 0.405            |    | 0.124              |                             |                                 |
| Δ Baseline - 6 cycles          | 28 | 4.4 ± 27.9       | 37 | -6.9 ± 26.9        | -11.4 (-25.1 – 2.2)         | 0.100                           |
| <b>Physical functioning</b>    |    |                  |    |                    |                             |                                 |
| Baseline                       | 53 | 68.0 ± 24.6      | 59 | 66.6 ± 23.4        | -1.3 (-10.4 – 7.6)          | 0.762                           |
| 2 cycles                       | 35 | 73.3 ± 21.3      | 48 | 69.8 ± 20.6        |                             |                                 |
| 4 cycles                       | 32 | 71.4 ± 24.3      | 41 | 68.1 ± 25.2        |                             |                                 |
| 6 cycles                       | 28 | 75.2 ± 20.8      | 37 | 54.7 ± 26.3        | -8.2 (-20.2 -3.8)           | 0.179                           |
| P Baseline - 6 cycles          |    | 0.956            |    | 0.496              |                             |                                 |
| Δ Baseline - 6 cycles          | 28 | 0.2 ± 22.4       | 37 | -3.0 ± 27.1        | -3.2 (-15.9 – 9.3)          | 0.603                           |
| <b>Role functioning</b>        |    |                  |    |                    |                             |                                 |
| Baseline                       | 53 | 60.3 ± 33.6      | 58 | 61.2 ± 32.5        | 0.8 (-11.6 – 13.2)          | 0.895                           |
| 2 cycles                       | 35 | 68.0 ± 29.8      | 48 | 64.2 ± 30.5        |                             |                                 |
| 4 cycles                       | 32 | 63.0 ± 33.7      | 41 | 64.6 ± 34.1        |                             |                                 |
| 6 cycles                       | 28 | 66.0 ± 29.5      | 37 | 66.2 ± 30.0        | 0.1 (-14.7 – 15.0)          | 0.984                           |
| P Baseline - 6 cycles          |    | 0.565            |    | 0.877              |                             |                                 |

|                              |    |             |    |              |                        |              |
|------------------------------|----|-------------|----|--------------|------------------------|--------------|
| Δ Baseline - 6 cycles        | 26 | -6.4 ± 25.8 | 34 | -1.9 ± 41.5  | 4.4 (-13.0 – 21.9)     | 0.613        |
| <b>Emotional functioning</b> |    |             |    |              |                        |              |
| Baseline                     | 53 | 69.1 ± 23.4 | 59 | 68.3 ± 22.2  | -0.8 (-9.3 – 7.7)      | 0.850        |
| 2 cycles                     | 33 | 76.0 ± 19.7 | 45 | 73.7 ± 23.2  |                        |              |
| 4 cycles                     | 32 | 74.7 ± 24.2 | 41 | 72.1 ± 27.2  |                        |              |
| 6 cycles                     | 28 | 78.5 ± 20.5 | 37 | 75.6 ± 19.1  | -2.8 (-12.8 – 7.0)     | 0.561        |
| P Baseline - 6 cycles        |    | 0.260       |    | 0.337        |                        |              |
| Δ Baseline - 6 cycles        | 28 | 6.2 ± 28.7  | 37 | 3.3 ± 21.1   | -2.8 (-15.2 – 9.4)     | 0.644        |
| <b>Cognitive functioning</b> |    |             |    |              |                        |              |
| Baseline                     | 53 | 81.4 ± 25.0 | 59 | 79.9 ± 21.8  | -1.5 (-10.2 – 7.2)     | 0.735        |
| 2 cycles                     | 33 | 82.3 ± 19.0 | 45 | 81.1 ± 23.1  |                        |              |
| 4 cycles                     | 32 | 81.2 ± 19.2 | 40 | 77.4 ± 24.6  |                        |              |
| 6 cycles                     | 28 | 76.7 ± 24.9 | 37 | 83.7 ± 22.7  | 6.9 (-4.8 – 18.8)      | 0.243        |
| P Baseline - 6 cycles        |    | 0.141       |    | 0.924        |                        |              |
| Δ Baseline - 6 cycles        | 28 | -7.7 ± 27.0 | 37 | 0.4 ± 28.7   | 8.1 (-5.8 – 22.2)      | 0.248        |
| <b>Social functioning</b>    |    |             |    |              |                        |              |
| Baseline                     | 53 | 78.3 ± 27.4 | 59 | 65.5 ± 32.4  | -12.7 (-24.0 – (-1.4)) | <b>0.027</b> |
| 2 cycles                     | 33 | 64.6 ± 26.9 | 45 | 69.2 ± 27.7  |                        |              |
| 4 cycles                     | 32 | 66.1 ± 26.9 | 41 | 63.0 ± 28.9  |                        |              |
| 6 cycles                     | 28 | 68.4 ± 26.1 | 37 | 62.6 ± 31.7  | -5.8 (-20.6 – 8.9)     | 0.432        |
| P Baseline - 6 cycles        |    | 0.330       |    | 0.066        |                        |              |
| Δ Baseline - 6 cycles        | 28 | -7.1 ± 38.0 | 37 | -12.1 ± 39.0 | -5.01 (-24.3 – 14.3)   | 0.606        |
| <b>Fatigue</b>               |    |             |    |              |                        |              |
| Baseline                     | 53 | 44.6 ± 26.1 | 59 | 44.0 ± 26.0  | -0.5 (-10.3 – 9.2)     | 0.906        |

|                       |    |              |    |               |                     |       |
|-----------------------|----|--------------|----|---------------|---------------------|-------|
| 2 cycles              | 35 | 39.0 ± 24.6  | 48 | 40.9 ± 26.1   |                     |       |
| 4 cycles              | 32 | 40.9 ± 24.0  | 41 | 42.2 ± 26.6   |                     |       |
| 6 cycles              | 28 | 37.6 ± 23.6  | 37 | 41.7 ± 24.9   | 4.0 (-8.1 – 16.2)   | 0.510 |
| P Baseline - 6 cycles |    | 0.695        |    | 0.721         |                     |       |
| Δ Baseline - 6 cycles | 28 | -2.3 ± 31.7  | 37 | 1.5 ± 25.4    | 3.8 (-10.2 – 18.0)  | 0.586 |
| Nausea and vomiting   |    |              |    |               |                     |       |
| Baseline              | 53 | 24.2 ± 29.1  | 58 | 15.2 ± 17.4   | -8.9 (-18.1 – 0.1)  | 0.055 |
| 2 cycles              | 35 | 26.6 ± 27.4  | 48 | 21.8 ± 25.3   |                     |       |
| 4 cycles              | 31 | 18.2         | 41 | 23.5 ± 28.6   |                     |       |
| 6 cycles              | 28 | 19.6 ± 27.2  | 37 | 15.3 ± 15.8   | -4.3 (-15.0 – 6.4)  | 0.425 |
| P Baseline - 6 cycles |    | 0.170        |    | 0.790         |                     |       |
| Δ Baseline - 6 cycles | 28 | -8.9 ± 33.4  | 37 | -0.9 ± 20.3   | 8.0 (-6.4 – 22.4)   | 0.236 |
| Pain                  |    |              |    |               |                     |       |
| Baseline              | 53 | 35.2 ± 29.1  | 59 | 38.7 ± 27.9   | 3.4 (-7.2 – 14.1)   | 0.520 |
| 2 cycles              | 35 | 30.4 ± 24.4  | 46 | 33.6 ± 26.6   |                     |       |
| 4 cycles              | 32 | 31.7 ± 22.5  | 41 | 38.2 ± 34.0   |                     |       |
| 6 cycles              | 28 | 35.7 ± 26.3  | 37 | 35.5 ± 28.9   | -0.1 (-14.0 – 13.8) | 0.985 |
| P Baseline - 6 cycles |    | <b>0.039</b> |    | 0.115         |                     |       |
| Δ Baseline - 6 cycles | 28 | 11.3 ± 27.6  | 37 | -29.7 ± 112.0 | -41.0 (-84.4 – 2.3) | 0.063 |
| Dyspnea               |    |              |    |               |                     |       |
| Baseline              | 52 | 29.4 ± 30.7  | 59 | 25.9 ± 27.0   | -3.4 (-14.3 – 7.3)  | 0.525 |
| 2 cycles              | 35 | 20.9 ± 24.3  | 48 | 27.0 ± 31.2   |                     |       |
| 4 cycles              | 32 | 23.9 ± 21.1  | 41 | 25.2 ± 30.5   |                     |       |
| 6 cycles              | 28 | 19.0 ± 23.0  | 37 | 19.8 ± 25.4   | 0.7 (-11.4 – 12.9)  | 0.900 |
| P Baseline - 6 cycles |    | 0.587        |    | 0.281         |                     |       |
| Δ Baseline - 6 cycles | 27 | -3.7 ± 35.0  | 37 | -4.5 ± 25.0   | -0.8 (-15.7 – 14.1) | 0.915 |

|                       |    |             |    |             |                      |       |
|-----------------------|----|-------------|----|-------------|----------------------|-------|
| Insomnia              |    |             |    |             |                      |       |
| Baseline              | 53 | 40.2 ± 35.4 | 59 | 37.8 ± 29.9 | -2.3 (-14.6 – 9.8)   | 0.699 |
| 2 cycles              | 35 | 30.4 ± 28.4 | 47 | 25.5 ± 25.2 |                      |       |
| 4 cycles              | 32 | 33.3 ± 31.6 | 41 | 22.7 ± 28.3 |                      |       |
| 6 cycles              | 28 | 30.9 ± 29.9 | 37 | 26.1 ± 28.4 | -4.8 (-19.4 – 9.7)   | 0.511 |
| P Baseline - 6 cycles |    | 0.892       |    | 0.078       |                      |       |
| Δ Baseline - 6 cycles | 28 | -1.1 ± 45.7 | 37 | -9.9 ± 33.2 | -8.7 (-28.2 – 10.8)  | 0.377 |
| Appetite loss         |    |             |    |             |                      |       |
| Baseline              | 53 | 38.3 ± 34.2 | 59 | 36.1 ± 31.7 | -2.2 (-14.5 – 10.1)  | 0.724 |
| 2 cycles              | 35 | 27.6 ± 33.8 | 48 | 38.1 ± 35.0 |                      |       |
| 4 cycles              | 32 | 35.4 ± 33.8 | 41 | 35.7 ± 34.4 |                      |       |
| 6 cycles              | 28 | 26.1 ± 30.5 | 37 | 32.4 ± 26.6 | 6.2 (-7.9 – 20.4)    | 0.383 |
| P Baseline - 6 cycles |    | 0.449       |    | 0.674       |                      |       |
| Δ Baseline - 6 cycles | 28 | -7.1 ± 49.1 | 37 | -2.7 ± 38.7 | 4.4 (-17.3 – 26.2)   | 0.685 |
| Constipation          |    |             |    |             |                      |       |
| Baseline              | 53 | 20.7 ± 28.6 | 59 | 27.6 ± 30.4 | 6.9 (-4.1 – 18.0)    | 0.219 |
| 2 cycles              | 35 | 21.9 ± 27.9 | 48 | 19.4 ± 29.0 |                      |       |
| 4 cycles              | 32 | 18.7 ± 28.0 | 41 | 21.9 ± 25.3 |                      |       |
| 6 cycles              | 28 | 17.8 ± 21.2 | 37 | 24.3 ± 26.8 | 6.4 (-5.8 – 18.7)    | 0.298 |
| P Baseline - 6 cycles |    | 0.599       |    | 0.544       |                      |       |
| Δ Baseline - 6 cycles | 28 | -3.5 ± 35.5 | 37 | -3.6 ± 35.8 | -0.03 (-17.8 – 17.8) | 0.997 |
| Diarrhea              |    |             |    |             |                      |       |
| Baseline              | 53 | 8.8 ± 19.7  | 59 | 12.9 ± 21.4 | 4.1 (-3.5 – 11.9)    | 0.287 |
| 2 cycles              | 34 | 16.6 ± 26.2 | 45 | 17.0 ± 23.1 |                      |       |
| 4 cycles              | 32 | 10.4 ± 15.6 | 41 | 10.5 ± 21.6 |                      |       |

|                               |    |              |    |              |                        |              |
|-------------------------------|----|--------------|----|--------------|------------------------|--------------|
| 6 cycles                      | 28 | 14.2 ± 24.7  | 37 | 13.5 ± 16.5  | -0.7 (-11.0 – 9.4)     | 0.881        |
| P Baseline - 6 cycles         |    | 0.861        |    | 0.661        |                        |              |
| Δ Baseline - 6 cycles         | 28 | 1.1 ± 35.6   | 37 | 1.8 ± 24.7   | 0.6 (-14.3 – 15.6)     | 0.935        |
| <b>Financial difficulties</b> |    |              |    |              |                        |              |
| Baseline                      | 53 | 51.5 ± 31.7  | 59 | 61.5 ± 34.3  | 10.0 (-2.4 – 22.4)     | 0.113        |
| 2 cycles                      | 33 | 66.6 ± 28.8  | 45 | 57.0 ± 34.5  |                        |              |
| 4 cycles                      | 31 | 62.3 ± 29.4  | 41 | 63.4 ± 30.5  |                        |              |
| 6 cycles                      | 28 | 63.0 ± 29.1  | 37 | 65.7 ± 38.0  | 2.6 (-13.9 – 19.3)     | 0.750        |
| P Baseline - 6 cycles         |    | 0.164        |    | 0.680        |                        |              |
| Δ Baseline - 6 cycles         | 28 | 10.7 ± 39.6  | 37 | 2.7 ± 39.5   | -8.0 (-27.8 – 11.8)    | 0.422        |
| <b>Dyspnea 2</b>              |    |              |    |              |                        |              |
| Baseline                      | 53 | 29.3 ± 23.4  | 58 | 28.1 ± 25.6  | -1.1 (-10.4 – 8.0)     | 0.800        |
| 2 cycles                      | 35 | 27.9 ± 24.8  | 48 | 26.6 ± 25.4  |                        |              |
| 4 cycles                      | 32 | 24.6 ± 22.5  | 40 | 24.1 ± 24.8  |                        |              |
| 6 cycles                      | 28 | 22.6 ± 18.2  | 37 | 19.2 ± 23.3  | -3.3 (-14.0 – 7.2)     | 0.527        |
| P Baseline - 6 cycles         |    | 0.854        |    | 0.343        |                        |              |
| Δ Baseline - 6 cycles         | 28 | -0.7 ± 22.6  | 37 | -4.2 ± 26.6  | -3.4 (-15.9 – 9.0)     | 0.588        |
| <b>Coughing</b>               |    |              |    |              |                        |              |
| Baseline                      | 53 | 53.4 ± 27.2  | 58 | 37.9 ± 30.8  | -15.5 (-26.5 – (-4.5)) | <b>0.006</b> |
| 2 cycles                      | 35 | 39.0 ± 24.9  | 48 | 31.2 ± 28.6  |                        |              |
| 4 cycles                      | 32 | 34.3 ± 19.8  | 40 | 29.9 ± 23.6  |                        |              |
| 6 cycles                      | 28 | 29.7 ± 22.8  | 37 | 20.7 ± 22.7  | -9.0 (-20.4 – 2.3)     | 0.118        |
| P Baseline - 6 cycles         |    | <b>0.032</b> |    | <b>0.034</b> |                        |              |
| Δ Baseline - 6 cycles         | 28 | -13.0 ± 30.5 | 37 | -13.5 ± 37.2 | -0.4 (-17.7 – 16.8)    | 0.962        |
| <b>Haemoptysis</b>            |    |              |    |              |                        |              |

|                              |    |              |    |             |                        |              |
|------------------------------|----|--------------|----|-------------|------------------------|--------------|
| Baseline                     | 53 | 17.6 ± 25.8  | 58 | 6.8 ± 16.2  | -10.7 (-18.7 – (-2.6)) | <b>0.009</b> |
| 2 cycles                     | 35 | 4.7 ± 11.8   | 48 | 3.4 ± 12.3  |                        |              |
| 4 cycles                     | 32 | 6.2 ± 13.2   | 40 | 0.8 ± 5.2   |                        |              |
| 6 cycles                     | 28 | 7.1 ± 22.8   | 37 | 5.4 ± 12.4  | -1.7 (-10.5 – 7.1)     | 0.696        |
| P Baseline - 6 cycles        |    | 0.165        |    | 0.324       |                        |              |
| Δ Baseline - 6 cycles        | 28 | -8.3 ± 30.9  | 37 | -2.7 ± 16.4 | 5.6 (-7.4 – 18.6)      | 0.387        |
| <b>Sore mouth</b>            |    |              |    |             |                        |              |
| Baseline                     | 53 | 3.7 ± 12.5   | 58 | 9.1 ± 20.5  | 5.4 (-0.9 – 11.7)      | 0.093        |
| 2 cycles                     | 35 | 8.5 ± 18.6   | 48 | 9.0 ± 20.3  |                        |              |
| 4 cycles                     | 32 | 7.2 ± 16.3   | 40 | 11.6 ± 25.6 |                        |              |
| 6 cycles                     | 28 | 5.9 ± 15.8   | 36 | 6.4 ± 15.5  | 0.5 (-7.3 – 8.4)       | 0.894        |
| P Baseline - 6 cycles        |    | 0.999        |    | 0.413       |                        |              |
| Δ Baseline - 6 cycles        | 28 | 0 ± 15.7     | 36 | -2.7 ± 20.1 | -2.7 (-12.0 – 6.4)     | 0.550        |
| <b>Dysphagia</b>             |    |              |    |             |                        |              |
| Baseline                     | 53 | 20.7 ± 30.8  | 58 | 10.9 ± 20.1 | -9.8 (-19.7 – 0.08)    | 0.052        |
| 2 cycles                     | 35 | 19.0 ± 30.5  | 48 | 20.8 ± 30.4 |                        |              |
| 4 cycles                     | 32 | 14.5 ± 25.3  | 40 | 15.0 ± 29.1 |                        |              |
| 6 cycles                     | 28 | 4.7 ± 11.8   | 37 | 14.4 ± 21.5 | 9.6 (1.2 – 18.0)       | <b>0.025</b> |
| P Baseline - 6 cycles        |    | <b>0.013</b> |    | 0.556       |                        |              |
| Δ Baseline - 6 cycles        | 28 | -13.0        | 37 | 2.7 ± 27.6  | 15.7 (2.2 – 29.3)      | <b>0.023</b> |
| <b>Peripheral neuropathy</b> |    |              |    |             |                        |              |
| Baseline                     | 53 | 23.2 ± 29.6  | 58 | 24.1 ± 52.9 | 0.8 (-15.4 – 17.2)     | 0.916        |
| 2 cycles                     | 35 | 36.1 ± 31.6  | 48 | 24.9 ± 28.7 |                        |              |
| 4 cycles                     | 32 | 35.4 ± 32.7  | 40 | 30.8 ± 30.5 |                        |              |

|                                |    |              |    |              |                      |       |
|--------------------------------|----|--------------|----|--------------|----------------------|-------|
| 6 cycles                       | 28 | 36.9 ± 29.1  | 37 | 32.4 ± 31.9  | -4.4 (-19.8 – 10-.9) | 0.564 |
| P Baseline - 6 cycles          |    | 0.161        |    | <b>0.022</b> |                      |       |
| Δ Baseline - 6 cycles          | 28 | 9.5 ± 34.9   | 37 | 15.3 ± 38.9  | 5.7 (-12.8 – 24.4)   | 0.538 |
| <b>Alopecia</b>                |    |              |    |              |                      |       |
| Baseline                       | 53 | 22.6 ± 37.9  | 58 | 22.9 ± 33.7  | 0.3 (-13.1 – 13.8)   | 0.959 |
| 2 cycles                       | 35 | 65.7 ± 37.4  | 48 | 55.5 ± 43.6  |                      |       |
| 4 cycles                       | 32 | 64.5 ± 35.8  | 40 | 50.0 ± 44.6  |                      |       |
| 6 cycles                       | 28 | 54.7 ± 43.7  | 36 | 36.1 ± 42.4  | -18.6 (-40.3 – 3.0)  | 0.090 |
| P Baseline - 6 cycles          |    | <b>0.013</b> |    | <b>0.042</b> |                      |       |
| Δ Baseline - 6 cycles          | 28 | 28.5 ± 57.1  | 36 | 16.6 ± 47.4  | -11.9 (-38.0 – 14.2) | 0.366 |
| <b>Pain in chest</b>           |    |              |    |              |                      |       |
| Baseline                       | 53 | 30.8 ± 31.2  | 58 | 24.1 ± 33.5  | -6.6 (-18.8 – 5.5)   | 0.281 |
| 2 cycles                       | 35 | 19.0 ± 23.2  | 48 | 24.9 ± 31.1  |                      |       |
| 4 cycles                       | 32 | 18.7 ± 20.6  | 39 | 23.9 ± 29.5  |                      |       |
| 6 cycles                       | 28 | 15.4 ± 26.4  | 37 | 22.5 ± 27.2  | 7.0 (-6.4 – 20.5)    | 0.300 |
| P Baseline - 6 cycles          |    | 0.147        |    | 0.638        |                      |       |
| Δ Baseline - 6 cycles          | 28 | -9.5 ± 33.7  | 37 | 2.7 ± 34.5   | 12.2 (-4.9 – 29.3)   | 0.159 |
| <b>Pain in arm or shoulder</b> |    |              |    |              |                      |       |
| Baseline                       | 52 | 23.7 ± 31.1  | 58 | 27.0 ± 30.8  | 3.2 (-8.4 – 15.0)    | 0.579 |
| 2 cycles                       | 35 | 18.0 ± 26.0  | 48 | 15.2 ± 25.6  |                      |       |
| 4 cycles                       | 32 | 19.7 ± 25.2  | 40 | 14.9 ± 27.1  |                      |       |
| 6 cycles                       | 27 | 30.8 ± 26.0  | 37 | 25.2 ± 29.8  | -5.6 (-19.9 – 8.6)   | 0.434 |
| P Baseline - 6 cycles          |    | <b>0.019</b> |    | 0.999        |                      |       |
| Δ Baseline - 6 cycles          | 27 | 13.5 ± 28.1  | 37 | 0 ± 36.8     | -13.5 (-30.5 – 3.3)  | 0.114 |

| Pain in other parts   |    |             |    |             |                     |       |
|-----------------------|----|-------------|----|-------------|---------------------|-------|
| Baseline              | 53 | 23.8 ± 23.9 | 57 | 27.0 ± 30.8 | 8.2 (-1.4 – 18.0)   | 0.096 |
| 2 cycles              | 34 | 25.4 ± 23.2 | 46 | 26.8 ± 19.3 |                     |       |
| 4 cycles              | 32 | 23.9 ± 22.7 | 38 | 25.4 ± 18.0 |                     |       |
| 6 cycles              | 27 | 27.1 ± 24.5 | 35 | 28.5 ± 25.7 | 1.4 (-11.5 – 14.3)  | 0.828 |
| P Baseline - 6 cycles |    | 0.542       |    | 0.762       |                     |       |
| Δ Baseline - 6 cycles | 27 | 3.7 ± 31.1  | 35 | -1.9 ± 36.9 | -5.6 (-23.3 – 12.1) | 0.529 |

**Supplementary Table 2.** Health-related quality of life among patients with a poor performance status (ECOG >1)

| Health related quality of life | n  | C<br>(mean ± DE) | n  | EPC<br>(mean ± DE) | Mean difference<br>(95% CI) | p<br><small>(t student)</small> |
|--------------------------------|----|------------------|----|--------------------|-----------------------------|---------------------------------|
| Global health status           |    |                  |    |                    |                             |                                 |
| Baseline                       | 14 | 55.3 ± 27.6      | 11 | 45.4 ± 28.9)       | -9.9 (-33.4 – 13.6)         | 0.393                           |
| 2 cycles                       | 9  | 56.4 ± 13.0      | 8  | 63.5 ± 20.3        |                             |                                 |
| 4 cycles                       | 7  | 54.7 ± 28.8      | 8  | 51.0 ± 15.7        |                             |                                 |
| 6 cycles                       | 6  | 56.9 ± 16.1      | 5  | 53.3 ± 28.0        | -3.6 (-34.0 – 26.8)         | 0.794                           |
| P Baseline - 6 cycles          |    | 0.822            |    | 0.578              |                             |                                 |
| Δ Baseline - 6 cycles          | 6  | -2.7 ± 28.7      | 5  | 9.9 ± 36.9         | 12.7 (-31.9 – 57.4)         | 0.534                           |
| Physical functioning           |    |                  |    |                    |                             |                                 |
| Baseline                       | 14 | 41.9 ± 31.8      | 11 | 53.3 ± 32.2        | 11.4 (-15.2 – 38.1)         | 0.385                           |
| 2 cycles                       | 9  | 50.3 ± 29.2      | 8  | 54.9 ± 21.8        |                             |                                 |
| 4 cycles                       | 7  | 52.3 ± 31.1      | 8  | 50.0 ± 13.8        |                             |                                 |
| 6 cycles                       | 6  | 57.7 ± 35.1      | 5  | 50.6 ± 35.4        | -7.1 (-55.4 – 41.2)         | 0.747                           |



|                              |    |                 |    |                 |                      |       |
|------------------------------|----|-----------------|----|-----------------|----------------------|-------|
| P Baseline - 6 cycles        |    | 0.150           |    | 0.730           |                      |       |
| $\Delta$ Baseline - 6 cycles | 6  | 12.2 $\pm$ 17.5 | 5  | -8.0 $\pm$ 48.3 | -20.2 (-67.9 – 27.4) | 0.363 |
| <b>Role functioning</b>      |    |                 |    |                 |                      |       |
| Baseline                     | 14 | 33.3 $\pm$ 36.3 | 11 | 54.5 $\pm$ 35.0 | 21.2 (-8.6 – 51.0)   | 0.155 |
| 2 cycles                     | 9  | 48.1 $\pm$ 37.6 | 8  | 29.1 $\pm$ 31.8 |                      |       |
| 4 cycles                     | 7  | 52.3 $\pm$ 41.3 | 8  | 58.3 $\pm$ 37.7 |                      |       |
| 6 cycles                     | 6  | 61.1 $\pm$ 37.5 | 5  | 56.6 $\pm$ 40.1 | -4.4 (-57.4 – 48.5)  | 0.854 |
| P Baseline - 6 cycles        |    | 0.117           |    | 0.883           |                      |       |
| $\Delta$ Baseline - 6 cycles | 6  | 2.7 $\pm$ 12.5  | 4  | 33.3 $\pm$ 36   | 30.5 (-5.4 – 66.5)   | 0.086 |
| <b>Emotional functioning</b> |    |                 |    |                 |                      |       |
| Baseline                     | 13 | 48.7 $\pm$ 34.3 | 11 | 57.5 $\pm$ 28.7 | 8.8 (-18.2 – 35.9)   | 0.505 |
| 2 cycles                     | 9  | 59.2 $\pm$ 33.4 | 8  | 80.2 $\pm$ 20.3 |                      |       |
| 4 cycles                     | 7  | 76.1 $\pm$ 15.5 | 8  | 82.2 $\pm$ 10.3 |                      |       |
| 6 cycles                     | 6  | 68.0 $\pm$ 39.2 | 5  | 60.0 $\pm$ 28.5 | -8.0 (-55.8 – 39.7)  | 0.712 |
| P Baseline - 6 cycles        |    | 0.624           |    | 0.639           |                      |       |
| $\Delta$ Baseline - 6 cycles | 6  | 4.1 $\pm$ 19.5  | 5  | -8.3 $\pm$ 36.7 | -12.4 (-51.5 – 26.5) | 0.488 |
| <b>Cognitive functioning</b> |    |                 |    |                 |                      |       |
| Baseline                     | 14 | 66.6 $\pm$ 36.9 | 11 | 69.6 $\pm$ 27.7 | 3.0 (-24.6 – 30.7)   | 0.823 |
| 2 cycles                     | 9  | 62.9 $\pm$ 32.0 | 8  | 70.8 $\pm$ 26.3 |                      |       |
| 4 cycles                     | 7  | 80.9 $\pm$ 17.8 | 8  | 72.9 $\pm$ 21.7 |                      |       |
| 6 cycles                     | 6  | 86.1 $\pm$ 26.7 | 5  | 66.6 $\pm$ 42.4 | -19.4 (-66.8 – 27.9) | 0.378 |
| P Baseline - 6 cycles        |    | <b>0.042</b>    |    | 0.818           |                      |       |

|                            |    |              |    |             |                      |       |
|----------------------------|----|--------------|----|-------------|----------------------|-------|
| Δ Baseline - 6 cycles      | 6  | 13.8 ± 12.5  | 5  | -6.6 ± 60.7 | -20.5 (-95.3 – 54.2) | 0.496 |
| <b>Social functioning</b>  |    |              |    |             |                      |       |
| Baseline                   | 14 | 38.0 ± 36.0  | 11 | 65.1 ± 38.3 | 27.0 (-3.8 – 57.9)   | 0.083 |
| 2 cycles                   | 9  | 37.0 ± 27.3  | 8  | 74.9 ± 34.5 |                      |       |
| 4 cycles                   | 7  | 57.1 ± 38.3  | 8  | 64.5 ± 35.0 |                      |       |
| 6 cycles                   | 6  | 50.0 ± 42.1  | 5  | 73.3 ± 30.2 | 23.3 (-27.8 – 74.4)  | 0.329 |
| P Baseline - 6 cycles      |    | 0.771        |    | 0.999       |                      |       |
| Δ Baseline - 6 cycles      | 6  | 5.5 ± 44.3   | 5  | 0.0 ± 45.6  | -5.5 (-67.7 – 56.6)  | 0.843 |
| <b>Fatigue</b>             |    |              |    |             |                      |       |
| Baseline                   | 14 | 61.9 ± 26.0  | 11 | 49.4 ± 25.0 | -12.4 (-33.7 – 8.9)  | 0.241 |
| 2 cycles                   | 9  | 55.5 ± 28.3  | 8  | 58.3 ± 16.5 |                      |       |
| 4 cycles                   | 7  | 41.2 ± 25.4  | 8  | 50.0 ± 14.5 |                      |       |
| 6 cycles                   | 6  | 42.5 ± 25.7  | 5  | 46.6 ± 30.8 | 4.0 (-34.4 – 42.5)   | 0.816 |
| P Baseline - 6 cycles      |    | 0.058        |    | 0.697       |                      |       |
| Δ Baseline - 6 cycles      | 6  | -12.9 ± 12.9 | 5  | -6.6 ± 35.6 | 6.2 (-28.8 – 41.4)   | 0.695 |
| <b>Nausea and vomiting</b> |    |              |    |             |                      |       |
| Baseline                   | 13 | 28.2 ± 36.2  | 11 | 22.7 ± 22.6 | -5.4 (-31.6 – 20.7)  | 0.669 |
| 2 cycles                   | 9  | 42.5 ± 25.1  | 8  | 29.1 ± 26.3 |                      |       |
| 4 cycles                   | 7  | 33.3 ± 25.4  | 8  | 33.3 ± 26.7 |                      |       |
| 6 cycles                   | 6  | 47.2 ± 41.3  | 5  | 23.3 ± 22.3 | -23.8 (-70.8 – 23.0) | 0.279 |
| P Baseline - 6 cycles      |    | 0.129        |    | 0.815       |                      |       |
| Δ Baseline - 6 cycles      | 6  | 27.7 ± 37.5  | 5  | -3.3 ± 29.8 | -31.1 (-78.1 – 15.8) | 0.168 |
| <b>Pain</b>                |    |              |    |             |                      |       |

|                       |    |              |    |              |                      |       |
|-----------------------|----|--------------|----|--------------|----------------------|-------|
| Baseline              | 14 | 58.3 ± 31.8  | 11 | 42.4 ± 33.6  | -15.9 (-43.1 – 11.2) | 0.239 |
| 2 cycles              | 9  | 51.8 ± 37.6  | 8  | 29.1 ± 23.1  |                      |       |
| 4 cycles              | 7  | 50.0 ± 30.4  | 8  | 24.9 ± 21.8  |                      |       |
| 6 cycles              | 6  | 30.5 ± 35.6  | 5  | 30.0 ± 27.3  | -0.5 (-44.6 – 43.5)  | 0.978 |
| P Baseline - 6 cycles |    | 0.141        |    | 0.314        |                      |       |
| Δ Baseline - 6 cycles | 6  | -13.8 ± 19.4 | 5  | -16.6 ± 37.2 | -2.7 (-42.1 – 36.6)  | 0.877 |
| <b>Dyspnea</b>        |    |              |    |              |                      |       |
| Baseline              | 13 | 38.4 ± 44.8  | 11 | 33.3 ± 25.8  | -5.1 (-35.7 – 25.5)  | 0.730 |
| 2 cycles              | 7  | 61.9 ± 35.6  | 8  | 33.3 ± 25.1  |                      |       |
| 4 cycles              | 7  | 14.2 ± 17.8  | 8  | 33.3 ± 39.8  |                      |       |
| 6 cycles              | 6  | 22.2 ± 40.3  | 5  | 33.3 ± 40.8  | 11.1 (-44.4 – 66.6)  | 0.662 |
| P Baseline - 6 cycles |    | 0.999        |    | 0.999        |                      |       |
| Δ Baseline - 6 cycles | 6  | 0 ± 21.0     | 5  | 0 ± 33.3     | 0 (-37.2 – 37.2)     | 0.999 |
| <b>Insomnia</b>       |    |              |    |              |                      |       |
| Baseline              | 14 | 64.2 ± 30.5  | 11 | 57.5 ± 39.6  | -6.7 (-35.7 – 22.3)  | 0.637 |
| 2 cycles              | 8  | 45.8 ± 43.4  | 8  | 37.5 ± 45.2  |                      |       |
| 4 cycles              | 7  | 23.8 ± 31.7  | 8  | 37.4 ± 33.0  |                      |       |
| 6 cycles              | 6  | 38.8 ± 38.9  | 5  | 53.3 ± 29.8  | 14.4 (-33.7 – 62.6)  | 0.515 |
| P Baseline - 6 cycles |    | 0.296        |    | 0.838        |                      |       |
| Δ Baseline - 6 cycles | 6  | -16.6 ± 34.9 | 5  | -6.6 ± 68.3  | 9.9 (-61.8 – 81.8)   | 0.760 |
| <b>Appetite loss</b>  |    |              |    |              |                      |       |
| Baseline              | 13 | 46.1 ± 34.7  | 11 | 48.4 ± 34.5  | 2.3 (-27.1 – 31.7)   | 0.871 |
| 2 cycles              | 9  | 40.7 ± 27.7  | 8  | 41.6 ± 29.5  |                      |       |
| 4 cycles              | 7  | 52.3 ± 37.7  | 8  | 33.3 ± 17.8  |                      |       |
| 6 cycles              | 6  | 38.8 ± 32.7  | 5  | 59.9 ± 36.5  | 21.1 (-26.1 – 68.3)  | 0.338 |

|                               |    |              |    |              |                      |       |
|-------------------------------|----|--------------|----|--------------|----------------------|-------|
| P Baseline - 6 cycles         |    | 0.175        |    | 0.294        |                      |       |
| Δ Baseline - 6 cycles         | 6  | 11.1 ± 17.2  | 5  | 26.6 ± 49.4  | 15.5 (-32.8 – 64.0)  | 0.486 |
| <b>Constipation</b>           |    |              |    |              |                      |       |
| Baseline                      | 14 | 38.0 ± 31.6  | 11 | 21.2 ± 26.9  | -16.8 (-41.6 – 7.8)  | 0.172 |
| 2 cycles                      | 9  | 55.5 ± 40.8  | 8  | 54.1 ± 24.8  |                      |       |
| 4 cycles                      | 7  | 23.8 ± 25.1  | 8  | 33.3 ± 35.6  |                      |       |
| 6 cycles                      | 6  | 16.6 ± 40.8  | 5  | 0 ± 0        | -16.6 (-58.3 – 25.0) | 0.389 |
| P Baseline - 6 cycles         |    | 0.296        |    | 0.208        |                      |       |
| Δ Baseline - 6 cycles         | 6  | -16.6 ± 34.9 | 5  | -20.0 ± 29.8 | -3.3 (-48.2 – 41.5)  | 0.870 |
| <b>Diarrhea</b>               |    |              |    |              |                      |       |
| Baseline                      | 13 | 15.3 ± 32.2  | 11 | 12.1 ± 30.8  | -3.2 (-30.1 – 23.5)  | 0.803 |
| 2 cycles                      | 9  | 40.7 ± 40.0  | 8  | 8.3 ± 15.4   |                      |       |
| 4 cycles                      | 7  | 23.8 ± 25.1  | 8  | 8.3 ± 15.4   |                      |       |
| 6 cycles                      | 6  | 16.6 ± 18.2  | 5  | 26.6 ± 36.5  | 10.0 (-34.6 – 54.6)  | 0.599 |
| P Baseline - 6 cycles         |    | 0.999        |    | 0.999        |                      |       |
| Δ Baseline - 6 cycles         | 6  | -0.0 ± 36.5  | 5  | 0.0 ± 62.3   | 0 (-68.0 – 68.0)     | 0.999 |
| <b>Financial difficulties</b> |    |              |    |              |                      |       |
| Baseline                      | 14 | 76.1 ± 30.4  | 11 | 51.5 ± 34.5  | -24.6 (-51.5 – 2.2)  | 0.071 |
| 2 cycles                      | 9  | 66.6 ± 28.8  | 7  | 52.3 ± 26.2  |                      |       |
| 4 cycles                      | 7  | 57.1 ± 25.1  | 8  | 54.1 ± 43.4  |                      |       |
| 6 cycles                      | 6  | 72.2 ± 32.7  | 5  | 80.0 ± 50.5  | 7.7 (-49.2 – 64.7)   | 0.765 |
| P Baseline - 6 cycles         |    | 0.576        |    | 0.468        |                      |       |
| Δ Baseline - 6 cycles         | 6  | -11.1 ± 45.5 | 5  | 19.9 ± 55.7  | 31.1 (-37.8 – 100)   | 0.334 |
| <b>Dyspnea 2</b>              |    |              |    |              |                      |       |
| Baseline                      | 13 | 37.6 ± 24.6  | 11 | 36.3 ± 29.0  | -1.2 (-23.9 – 21.4)  | 0.911 |

|                       |    |             |    |              |                      |       |
|-----------------------|----|-------------|----|--------------|----------------------|-------|
| 2 cycles              | 9  | 37.0 ± 26.0 | 8  | 24.9 ± 27.0  |                      |       |
| 4 cycles              | 7  | 20.6 ± 25.1 | 8  | 26.3 ± 28.4  |                      |       |
| 6 cycles              | 6  | 24.0 ± 38.7 | 5  | 20.0 ± 29.8  | -4.0 (-52.1 – 43.9)  | 0.852 |
| P Baseline - 6 cycles |    | 0.363       |    | 0.108        |                      |       |
| Δ Baseline - 6 cycles | 6  | -5.5 ± 13.6 | 5  | -31.1 ± 33.7 | -25.5 (-66.6 – 15.5) | 0.171 |
| <b>Coughing</b>       |    |             |    |              |                      |       |
| Baseline              | 13 | 56.4 ± 34.3 | 11 | 54.5 ± 22.4  | -1.8 (-26.2 – 22.4)  | 0.875 |
| 2 cycles              | 9  | 40.7 ± 46.4 | 8  | 37.4 ± 21.3  |                      |       |
| 4 cycles              | 7  | 28.5 ± 29.9 | 8  | 37.5 ± 37.5  |                      |       |
| 6 cycles              | 6  | 50.0 ± 34.9 | 5  | 19.9 ± 18.2  | -30.0 (-69.3 – 9.3)  | 0.119 |
| P Baseline - 6 cycles |    | 0.121       |    | <b>0.034</b> |                      |       |
| Δ Baseline - 6 cycles | 6  | 0 ± 29.8    | 5  | -33.3 ± 23.5 | -33.3 (-70.6 – 3.9)  | 0.074 |
| <b>Haemoptysis</b>    |    |             |    |              |                      |       |
| Baseline              | 13 | 2.5 ± 9.2   | 11 | 3.0 ± 10.0   | 0.4 (-7.7 – 8.6)     | 0.907 |
| 2 cycles              | 9  | 0 ± 0       | 8  | 0 ± 0        |                      |       |
| 4 cycles              | 7  | 0 ± 0       | 8  | 8.3 ± 15.4   |                      |       |
| 6 cycles              | 6  | 0 ± 0       | 5  | 0 ± 0        | n/a                  | n/a   |
| P Baseline - 6 cycles |    | n/a         |    | 0.374        |                      |       |
| Δ Baseline - 6 cycles | 6  | 0 ± 0       | 5  | -6.6 ± 14.9  | -6.6 (-25.1 – 11.8)  | 0.374 |
| <b>Sore mouth</b>     |    |             |    |              |                      |       |
| Baseline              | 13 | 15.3 ± 32.2 | 11 | 21.2 ± 34.2  | 5.8 (-22.3 – 34.0)   | 0.672 |
| 2 cycles              | 9  | 14.8 ± 33.7 | 8  | 4.1 ± 11.7   |                      |       |
| 4 cycles              | 7  | 4.7 ± 12.5  | 8  | 8.3 ± 15.4   |                      |       |
| 6 cycles              | 6  | 11.1 ± 17.2 | 5  | 26.6 ± 27.8  | 15.5 (-15.3 – 46.4)  | 0.285 |
| P Baseline - 6 cycles |    | 0.363       |    | 0.749        |                      |       |

|                              |    |              |    |              |                      |       |
|------------------------------|----|--------------|----|--------------|----------------------|-------|
| Δ Baseline - 6 cycles        | 6  | -11.1 ± 27.2 | 5  | 6.6 ± 43.4   | 17.7 (-30.6 – 66.2)  | 0.428 |
| <b>Dysphagia</b>             |    |              |    |              |                      |       |
| Baseline                     | 13 | 35.8 ± 44.0  | 11 | 21.2 ± 22.4  | -14.6 (-43.9 – 14.5) | 0.306 |
| 2 cycles                     | 8  | 29.1 ± 33.0  | 8  | 41.6 ± 38.8  |                      |       |
| 4 cycles                     | 7  | 9.5 ± 16.2   | 8  | 25.0 ± 29.5  |                      |       |
| 6 cycles                     | 6  | 11.1 ± 27.2  | 5  | 46.6 ± 50.5  | 35.5 (-26.3 – 97.4)  | 0.209 |
| P Baseline - 6 cycles        |    | 0.363        |    | 0.337        |                      |       |
| Δ Baseline - 6 cycles        | 6  | -16.6 ± 40.8 | 5  | 26.6 ± 54.7  | 43.3 (-21.7 – 108.4) | 0.166 |
| <b>Peripheral neuropathy</b> |    |              |    |              |                      |       |
| Baseline                     | 13 | 25.6 ± 36.3  | 11 | 21.2 ± 30.8  | -4.4 (-32.8 – 24.0)  | 0.750 |
| 2 cycles                     | 9  | 51.8 ± 47.4  | 7  | 42.8 ± 46.0  |                      |       |
| 4 cycles                     | 7  | 42.8 ± 31.7  | 8  | 37.5 ± 37.5  |                      |       |
| 6 cycles                     | 6  | 55.5 ± 40.3  | 5  | 53.3 ± 50.5  | -2.2 (-64.1 – 59.6)  | 0.937 |
| P Baseline - 6 cycles        |    | <b>0.042</b> |    | 0.070        |                      |       |
| Δ Baseline - 6 cycles        | 6  | 27.7 ± 25.0  | 5  | 40.0 ± 36.5  | 12.2 (-33.4 – 57.9)  | 0.546 |
| <b>Alopecia</b>              |    |              |    |              |                      |       |
| Baseline                     | 13 | 28.2 ± 40.4  | 11 | 12.1 ± 16.8  | -16.0 (-43.2 – 11.0) | 0.232 |
| 2 cycles                     | 9  | 37.0 ± 42.3  | 8  | 58.3 ± 42.7  |                      |       |
| 4 cycles                     | 7  | 38.0 ± 35.6  | 8  | 62.5 ± 27.8  |                      |       |
| 6 cycles                     | 6  | 77.7 ± 40.3  | 5  | 73.3 ± 27.8  | -4.4 (-52.8 – 44.0)  | 0.840 |
| P Baseline - 6 cycles        |    | 0.178        |    | <b>0.009</b> |                      |       |
| Δ Baseline - 6 cycles        | 6  | 50.0 ± 78.1  | 5  | 60.0 ± 27.8  | 10.0 (-72.4 – 92.4)  | 0.780 |
| <b>Pain in chest</b>         |    |              |    |              |                      |       |

|                         |    |              |    |             |                     |              |
|-------------------------|----|--------------|----|-------------|---------------------|--------------|
| Baseline                | 13 | 25.6 ± 30.8  | 11 | 27.2 ± 25.0 | 1.6 (-22.4 – 25.7)  | 0.890        |
| 2 cycles                | 8  | 45.8 ± 39.5  | 7  | 42.8 ± 46.0 |                     |              |
| 4 cycles                | 7  | 19.0 ± 26.2  | 8  | 24.9 ± 23.5 |                     |              |
| 6 cycles                | 6  | 22.2 ± 40.3  | 5  | 40.0 ± 27.8 | 17.7 (-30.6 – 66.2) | 0.428        |
| P Baseline - 6 cycles   |    | 0.363        |    | 0.621       |                     |              |
| Δ Baseline - 6 cycles   | 6  | 0 ± 0        | 5  | 6.6 ± 27.8  | 6.6 (-27.9 – 41.3)  | 0.621        |
| Pain in arm or shoulder |    |              |    |             |                     |              |
| Baseline                | 13 | 33.3 ± 30.4  | 11 | 18.1 ± 22.9 | -15.1 (-38.3 – 8.0) | 0.189        |
| 2 cycles                | 9  | 55.5 ± 40.8  | 8  | 20.8 ± 35.3 |                     |              |
| 4 cycles                | 7  | 23.8 ± 25.1  | 8  | 16.6 ± 17.8 |                     |              |
| 6 cycles                | 6  | 27.7 ± 38.9  | 5  | 33.3 ± 23.5 | 5.5 (-39.6 – 50.7)  | 0.787        |
| P Baseline - 6 cycles   |    | 0.999        |    | 0.208       |                     |              |
| Δ Baseline - 6 cycles   | 6  | -11.1 ± 27.2 | 5  | 20.0 ± 29.8 | 31.1 (-8.6 – 70.8)  | 0.110        |
| Pain in other parts     |    |              |    |             |                     |              |
| Baseline                | 13 | 35.8 ± 21.3  | 11 | 33.3 ± 39.4 | -2.5 (-28.8 – 23.7) | 0.841        |
| 2 cycles                | 8  | 29.1 ± 33.0  | 8  | 16.6 ± 17.8 |                     |              |
| 4 cycles                | 6  | 27.7 ± 13.6  | 8  | 20.8 ± 17.2 |                     |              |
| 6 cycles                | 6  | 16.6 ± 18.2  | 5  | 33.3 ± 0.0  | 16.6 (-2.4 – 35.8)  | 0.076        |
| P Baseline - 6 cycles   |    | 0.203        |    | 0.070       |                     |              |
| Δ Baseline - 6 cycles   | 6  | -16.6 ± 27.8 | 5  | 19.9 ± 18.2 | 36.6 (3.6 – 69.6)   | <b>0.033</b> |

**Supplementary Table 3.** Health-related quality of life among patients without depression at baseline

| Health related quality of life | n  | C<br>(mean ± DE) | n  | EPC<br>(mean ± DE) | Mean difference<br>(95% CI) | p<br><small>(t student)</small> |
|--------------------------------|----|------------------|----|--------------------|-----------------------------|---------------------------------|
| <b>Global health status</b>    |    |                  |    |                    |                             |                                 |
| Baseline                       | 35 | 57.3 ± 23.2      | 34 | 70.3 ± 22.9        | 12.9 (1.8 – 24.0)           | 0.023                           |
| 2 cycles                       | 22 | 64.3 ± 17.2      | 59 | 67.8 ± 27.8        |                             |                                 |
| 4 cycles                       | 22 | 57.9 ± 23.3      | 26 | 66.9 ± 25.3        |                             |                                 |
| 6 cycles                       | 21 | 59.9 ± 21.6      | 25 | 64.0 ± 22.6        | 4.0 (-9.1 – 17.3)           | 0.538                           |
| P Baseline - 6 cycles          |    | 0.204            |    | 0.318              |                             |                                 |
| Δ Baseline - 6 cycles          | 21 | -5.9 ± 20.7      | 25 | -4.9 ± 24.5        | 0.9 (-12.7 – 14.6)          | 0.889                           |
| <b>Physical functioning</b>    |    |                  |    |                    |                             |                                 |
| Baseline                       | 35 | 71.4 ± 24.8      | 34 | 75.8 ± 20.8        | 4.4 (-6.5 – 15.4)           | 0.423                           |
| 2 cycles                       | 23 | 73.9 ± 22.9      | 30 | 77.1 ± 18.6        |                             |                                 |
| 4 cycles                       | 22 | 73.0 ± 23.8      | 26 | 74.1 ± 22.4        |                             |                                 |
| 6 cycles                       | 21 | 78.0 ± 19.3      | 25 | 78.9 ± 15.8        | 0.8 (-9.6 – 11.2)           | 0.872                           |
| P Baseline - 6 cycles          |    | 0.479            |    | 0.530              |                             |                                 |
| Δ Baseline - 6 cycles          | 21 | 3.4 ± 22.1       | 25 | 3.4 ± 27.2         | -0.02 (-14.9 – 14.9)        | 0.997                           |
| <b>Role functioning</b>        |    |                  |    |                    |                             |                                 |
| Baseline                       | 35 | 62.3 ± 32.4      | 33 | 76.7 ± 26.9        | 14.3 (-0.1 – 28.8)          | 0.052                           |
| 2 cycles                       | 23 | 72.4 ± 25.4      | 30 | 71.6 ± 30.3        |                             |                                 |
| 4 cycles                       | 22 | 69.6 ± 33.9      | 26 | 73.7 ± 29.1        |                             |                                 |
| 6 cycles                       | 21 | 76.1 ± 22.0      | 25 | 78.0 ± 22.4        | 1.8 (-11.4 – 15.0)          | 0.785                           |
| P Baseline - 6 cycles          |    | 0.370            |    | 0.648              |                             |                                 |
| Δ Baseline - 6 cycles          | 20 | 1.6 ± 25.8       | 22 | 6.8 ± 36.2         | 5.1 (-14.6 – 24.9)          | 0.602                           |
| <b>Emotional functioning</b>   |    |                  |    |                    |                             |                                 |
| Baseline                       | 35 | 76.4 ± 18.9      | 34 | 75.7 ± 18.7        | -0.6 (-9.7 – 8.3)           | 0.879                           |
| 2 cycles                       | 22 | 74.6 ± 19.8      | 29 | 77.0 ± 23.7        |                             |                                 |
| 4 cycles                       | 22 | 77.2 ± 21.6      | 26 | 74.6 ± 25.6        |                             |                                 |
| 6 cycles                       | 21 | 80.9 ± 19.0      | 25 | 80.3 ± 17.6        | -0.6 (-11.5 – 10.2)         | 0.910                           |



|                              |    |              |    |              |                     |       |
|------------------------------|----|--------------|----|--------------|---------------------|-------|
| P Baseline - 6 cycles        |    | 0.694        |    | 0.110        |                     |       |
| Δ Baseline - 6 cycles        | 21 | 2.3 ± 27.2   | 25 | 7.0 ± 21.0   | 4.6 (-9.7 – 18.9)   | 0.520 |
| <b>Cognitive functioning</b> |    |              |    |              |                     |       |
| Baseline                     | 35 | 89.5 ± 12.8  | 34 | 87.7 ± 16.5  | -1.7 (-8.8 – 5.3)   | 0.619 |
| 2 cycles                     | 22 | 84.0 ± 18.1  | 29 | 83.9 ± 23.7  |                     |       |
| 4 cycles                     | 22 | 86.3 ± 13.2  | 25 | 80.6 ± 23.9  |                     |       |
| 6 cycles                     | 21 | 80.1 ± 20.8  | 25 | 85.3 ± 20.0  | 5.1 (-6.9 – 17.3)   | 0.396 |
| P Baseline - 6 cycles        |    | 0.018        |    | 0.705        |                     |       |
| Δ Baseline - 6 cycles        | 21 | -11.9 ± 21.1 | 25 | -1.9 ± 26.0  | 9.9 (-4.3 – 24.1)   | 0.170 |
| <b>Social functioning</b>    |    |              |    |              |                     |       |
| Baseline                     | 35 | 80.4 ± 24.0  | 34 | 76.9 ± 28.1  | -3.5 (-16.0 – 9.0)  | 0.579 |
| 2 cycles                     | 22 | 66.6 ± 24.1  | 29 | 77.5 ± 22.3  |                     |       |
| 4 cycles                     | 22 | 75.0 ± 25.5  | 26 | 76.9 ± 17.6  |                     |       |
| 6 cycles                     | 21 | 72.2 ± 25.9  | 25 | 68.0 ± 30.7  | -4.2 (-21.3 – 12.9) | 0.622 |
| P Baseline - 6 cycles        |    | 0.310        |    | 0.156        |                     |       |
| Δ Baseline - 6 cycles        | 21 | -7.1 ± 31.4  | 25 | -11.3 ± 38.7 | -4.1 (-25.4 – 17.0) | 0.693 |
| <b>Fatigue</b>               |    |              |    |              |                     |       |
| Baseline                     | 35 | 39.9 ± 24.8  | 34 | 33.0 ± 21.4  | -6.9 (-18.1 – 4.1)  | 0.216 |
| 2 cycles                     | 23 | 36.7 ± 21.8  | 30 | 37.4 ± 26.8  |                     |       |
| 4 cycles                     | 22 | 37.3 ± 22.6  | 26 | 37.1 ± 25.5  |                     |       |
| 6 cycles                     | 21 | 32.8 ± 15.5  | 25 | 32.4 ± 17.5  | -0.3 (-10.2 – 9.5)  | 0.942 |
| P Baseline - 6 cycles        |    | 0.599        |    | 0.784        |                     |       |
| Δ Baseline - 6 cycles        | 21 | -3.1 ± 27.2  | 25 | -1.3 ± 24.0  | 1.8 (-13.4 – 17.0)  | 0.809 |
| <b>Nausea and vomiting</b>   |    |              |    |              |                     |       |
| Baseline                     | 35 | 12.3 ± 17.7  | 34 | 10.7 ± 15.2  | -1.5 (-9.5 – 6.3)   | 0.691 |
|                              | 23 | 25.3 ± 24.5  | 30 | 19.4 ± 27.3  |                     |       |
| 4 cycles                     | 21 | 19.0 ± 22.5  | 26 | 19.2 ± 24.8  |                     |       |
| 6 cycles                     | 21 | 18.2 ± 25.2  | 25 | 13.3 ± 15.2  | -4.9 (-17.0 – 7.2)  | 0.419 |

|                       |    |             |    |              |                     |       |
|-----------------------|----|-------------|----|--------------|---------------------|-------|
| P Baseline - 6 cycles |    | 0.637       |    | 0.866        |                     |       |
| Δ Baseline - 6 cycles | 21 | 3.9 ± 37.9  | 25 | 0.6 ± 19.5   | -3.3 (-20.8 – 14.2) | 0.706 |
| <b>Pain</b>           |    |             |    |              |                     |       |
| Baseline              | 35 | 31.4 ± 26.4 | 34 | 33.8 ± 27.6  | 2.3 (-10.6 – 15.3)  | 0.714 |
| 2 cycles              | 23 | 28.2 ± 24.8 | 29 | 29.8 ± 27.5  |                     |       |
| 4 cycles              | 22 | 33.3 ± 27.2 | 26 | 33.9 ± 33.8  |                     |       |
| 6 cycles              | 21 | 26.1 ± 25.0 | 25 | 31.3 ± 26.0  | 5.1 (-10.1 – 20.4)  | 0.501 |
| P Baseline - 6 cycles |    | 0.452       |    | 0.574        |                     |       |
| Δ Baseline - 6 cycles | 21 | 4.7 ± 28.4  | 25 | -3.3 ± 29.2  | -8.0 (-25.3 – 9.1)  | 0.349 |
| <b>Dyspnea</b>        |    |             |    |              |                     |       |
| Baseline              | 35 | 21.9 ± 27.9 | 34 | 22.5 ± 24.2  | 0.6 (-11.9 -13.2)   | 0.919 |
| 2 cycles              | 21 | 23.8 ± 21.4 | 30 | 22.2 ± 31.9  |                     |       |
| 4 cycles              | 22 | 24.2 ± 21.0 | 26 | 20.5 ± 28.4  |                     |       |
| 6 cycles              | 21 | 19.0 ± 22.5 | 25 | 15.9 ± 21.7  | -3.0 (-16.2 – 10.1) | 0.644 |
| P Baseline - 6 cycles |    | 0.329       |    | 0.203        |                     |       |
| Δ Baseline - 6 cycles | 21 | 6.3 ± 29.0  | 25 | -6.6 ± 25.4  | -13.0 (-29.2 – 3.1) | 0.113 |
| <b>Insomnia</b>       |    |             |    |              |                     |       |
| Baseline              | 35 | 41.9 ± 35.5 | 34 | 33.3 ± 30.7  | -8.5 (-24.5 – 7.4)  | 0.288 |
| 2 cycles              | 22 | 34.8 ± 29.9 | 30 | 19.9 ± 25.6  |                     |       |
| 4 cycles              | 22 | 33.3 ± 35.6 | 26 | 19.2 ± 26.9  |                     |       |
| 6 cycles              | 21 | 28.5 ± 30.3 | 25 | 21.3 ± 27.0  | -7.2 (-24.2 – 9.8)  | 0.397 |
| P Baseline - 6 cycles |    | 0.634       |    | 0.107        |                     |       |
| Δ Baseline - 6 cycles | 21 | -4.7 ± 45.0 | 25 | -12.0 ± 35.8 | -7.2 (-31.2 – 16.8) | 0.547 |
| <b>Appetite loss</b>  |    |             |    |              |                     |       |
| Baseline              | 35 | 26.6 ± 28.9 | 34 | 28.4 ± 33.9  | 1.7 (-13.3 – 16.9)  | 0.817 |
| 2 cycles              | 23 | 30.4 ± 31.6 | 30 | 28.8 ± 35.8  |                     |       |
| 4 cycles              | 22 | 34.8 ± 34.8 | 26 | 26.9 ± 31.2  |                     |       |
| 6 cycles              | 21 | 22.2 ± 24.3 | 25 | 29.3 ± 24.1  | 7.1 (-7.3 – 21.5)   | 0.327 |

|                               |    |             |    |             |                     |       |
|-------------------------------|----|-------------|----|-------------|---------------------|-------|
| P Baseline - 6 cycles         |    | 0.847       |    | 0.746       |                     |       |
| Δ Baseline - 6 cycles         | 21 | -1.5 ± 37.2 | 25 | -2.6 ± 40.7 | -1.0 (-24.4 – 22.2) | 0.926 |
| <b>Constipation</b>           |    |             |    |             |                     |       |
| Baseline                      | 35 | 21.9 ± 30.1 | 34 | 24.5 ± 33.1 | 2.6 (-12.6 – 17.8)  | 0.734 |
| 2 cycles                      | 23 | 20.2 ± 26.0 | 30 | 9.9 ± 19.8  |                     |       |
| 4 cycles                      | 22 | 21.2 ± 30.0 | 26 | 20.5 ± 28.4 |                     |       |
| 6 cycles                      | 21 | 14.2 ± 19.9 | 25 | 19.9 ± 25.4 | 5.7 (-8.0 – 19.4)   | 0.408 |
| P Baseline - 6 cycles         |    | 0.428       |    | 0.380       |                     |       |
| Δ Baseline - 6 cycles         | 21 | -6.3 ± 35.9 | 25 | -6.6 ± 37.2 | -0.3 (-22.1 – 21.5) | 0.977 |
| <b>Diarrhea</b>               |    |             |    |             |                     |       |
| Baseline                      | 35 | 3.8 ± 10.7  | 34 | 10.7 ± 19.6 | 6.9 (-0.7 – 14.6)   | 0.074 |
| 2 cycles                      | 22 | 27.2 ± 33.5 | 29 | 18.3 ± 26.1 |                     |       |
| 4 cycles                      | 22 | 13.6 ± 19.6 | 26 | 8.9 ± 22.2  |                     |       |
| 6 cycles                      | 21 | 14.2 ± 16.9 | 25 | 9.3 ± 15.2  | -4.9 (-14.5 – 4.6)  | 0.302 |
| P Baseline - 6 cycles         |    | 0.135       |    | 0.603       |                     |       |
| Δ Baseline - 6 cycles         | 21 | 7.9 ± 23.3  | 25 | -2.6 ± 25.3 | -10.6 (-25.1 – 3.9) | 0.150 |
| <b>Financial difficulties</b> |    |             |    |             |                     |       |
| Baseline                      | 35 | 53.3 ± 33.5 | 34 | 56.8 ± 36.2 | 3.5 (-13.2 – 20.3)  | 0.676 |
| 2 cycles                      | 22 | 63.6 ± 30.7 | 29 | 51.7 ± 35.1 |                     |       |
| 4 cycles                      | 21 | 52.3 ± 29.0 | 26 | 57.6 ± 32.0 |                     |       |
| 6 cycles                      | 21 | 65.0 ± 28.8 | 25 | 62.6 ± 41.1 | -2.4 (-23.9 – 19.1) | 0.822 |
| P Baseline - 6 cycles         |    | 0.448       |    | 0.548       |                     |       |
| Δ Baseline - 6 cycles         | 21 | 7.9 ± 47.0  | 25 | 5.3 ± 43.7  | -2.6 (-29.6 – 24.4) | 0.847 |
| <b>Dyspnea 2</b>              |    |             |    |             |                     |       |
| Baseline                      | 35 | 25.7 ± 23.9 | 34 | 21.2 ± 22.2 | -4.4 (-15.5 – 6.6)  | 0.425 |
| 2 cycles                      | 23 | 27.5 ± 21.9 | 30 | 23.7 ± 26.0 |                     |       |
| 4 cycles                      | 22 | 24.2 ± 23.1 | 26 | 21.7 ± 24.8 |                     |       |
| 6 cycles                      | 21 | 19.5 ± 16.4 | 25 | 14.2 ± 19.1 | -5.3 (-16.0 – 5.3)  | 0.319 |

|                       |    |              |    |              |                        |       |
|-----------------------|----|--------------|----|--------------|------------------------|-------|
| P Baseline - 6 cycles |    | 0.827        |    | 0.391        |                        |       |
| Δ Baseline - 6 cycles | 21 | 1.0 ± 21.9   | 25 | -4.4 ± 25.4  | -5.5 (-19.7 – 8.7)     | 0.441 |
| <b>Coughing</b>       |    |              |    |              |                        |       |
| Baseline              | 35 | 52.3 ± 27.1  | 34 | 36.2 ± 26.4  | -16.1 (-28.9 – (-3.2)) | 0.015 |
| 2 cycles              | 23 | 40.5 ± 30.0  | 30 | 35.5 ± 27.5  |                        |       |
| 4 cycles              | 22 | 31.8 ± 24.0  | 26 | 26.9 ± 24.9  |                        |       |
| 6 cycles              | 21 | 33.3 ± 25.8  | 25 | 18.6 ± 19.4  | -14.6 (-28.1 – (-1.2)) | 0.033 |
| P Baseline - 6 cycles |    | 0.130        |    | 0.015        |                        |       |
| Δ Baseline - 6 cycles | 21 | -11.1 ± 32.2 | 25 | -13.3 ± 25.4 | -2.22 (-19.3 – 14.9)   | 0.795 |
| <b>Haemoptysis</b>    |    |              |    |              |                        |       |
| Baseline              | 35 | 13.3 ± 20.1  | 34 | 4.9 ± 11.9   | -8.4 (-16.3 – (-0.4))  | 0.038 |
| 2 cycles              | 23 | 4.3 ± 11.4   | 30 | 1.1 ± 6.0    |                        |       |
| 4 cycles              | 22 | 3.0 ± 9.8    | 26 | 1.2 ± 6.5    |                        |       |
| 6 cycles              | 21 | 6.3 ± 22.6   | 25 | 3.9 ± 11.0   | -2.3 (-12.6 – 7.9)     | 0.649 |
| P Baseline - 6 cycles |    | 0.296        |    | 0.999        |                        |       |
| Δ Baseline - 6 cycles | 21 | -6.3 ± 27.1  | 25 | 0 ± 13.6     | 6.3 (-6.9 – 19.6)      | 0.338 |
| <b>Sore mouth</b>     |    |              |    |              |                        |       |
| Baseline              | 35 | 1.9 ± 7.8    | 34 | 5.8 ± 15.2   | 3.9 (-1.8 – 9.7)       | 0.177 |
| 2 cycles              | 23 | 4.3 ± 11.4   | 30 | 6.6 ± 20.3   |                        |       |
| 4 cycles              | 22 | 7.5 ± 14.2   | 26 | 12.8 ± 28.4  |                        |       |
| 6 cycles              | 21 | 3.1 ± 10.0   | 25 | 5.3 ± 12.4   | 2.1 (-4.6 -8.9)        | 0.527 |
| P Baseline - 6 cycles |    | 0.999        |    | 0.770        |                        |       |
| Δ Baseline - 6 cycles | 21 | 0 ± 10.5     | 25 | -1.3 ± 22.5  | -1.3 (-11.5 – 8.9)     | 0.794 |
| <b>Dysphagia</b>      |    |              |    |              |                        |       |
| Baseline              | 35 | 9.5 ± 20.7   | 34 | 8.8 ± 17.0   | -0.7 (-9.8 – 8.4)      | 0.879 |
| 2 cycles              | 22 | 13.6 ± 24.4  | 30 | 20.0 ± 32.2  |                        |       |
| 4 cycles              | 22 | 7.5 ± 17.6   | 26 | 11.5 ± 26.5  |                        |       |
| 6 cycles              | 21 | 4.7 ± 15.9   | 25 | 13.3 ± 21.5  | 8.5 (-2.8 – 20.0)      | 0.138 |

|                                |    |             |    |             |                     |       |
|--------------------------------|----|-------------|----|-------------|---------------------|-------|
| P Baseline - 6 cycles          |    | 0.329       |    | 0.161       |                     |       |
| Δ Baseline - 6 cycles          | 21 | -1.5 ± 7.2  | 25 | 5.3 ± 18.4  | 6.9 (-1.2 – 15.1)   | 0.095 |
| <b>Peripheral neuropathy</b>   |    |             |    |             |                     |       |
| Baseline                       | 35 | 16.1 ± 24.7 | 34 | 26.4 ± 63.9 | 10.2 (-12.9 – 33.4) | 0.379 |
| 2 cycles                       | 23 | 36.2 ± 34.6 | 30 | 24.4 ± 30.2 |                     |       |
| 4 cycles                       | 22 | 34.8 ± 29.9 | 26 | 26.9 ± 23.1 |                     |       |
| 6 cycles                       | 21 | 41.2 ± 29.6 | 25 | 27.9 ± 28.3 | -13.2 (-30.5 – 3.9) | 0.129 |
| P Baseline - 6 cycles          |    | 0.001       |    | 0.162       |                     |       |
| Δ Baseline - 6 cycles          | 21 | 23.8 ± 28.1 | 25 | 10.6 ± 36.9 | -13.1 (-32.5 – 6.2) | 0.178 |
| <b>Alopecia</b>                |    |             |    |             |                     |       |
| Baseline                       | 35 | 18.0 ± 32.6 | 34 | 22.5 ± 31.4 | 4.4 (-10.9 – 19.8)  | 0.566 |
| 2 cycles                       | 23 | 56.5 ± 40.7 | 30 | 66.6 ± 40.1 |                     |       |
| 4 cycles                       | 22 | 60.6 ± 33.5 | 26 | 46.1 ± 45.2 |                     |       |
| 6 cycles                       | 21 | 63.4 ± 44.6 | 24 | 40.2 ± 45.0 | -23.2 (-50.2 – 3.7) | 0.090 |
| P Baseline - 6 cycles          |    | 0.003       |    | 0.075       |                     |       |
| Δ Baseline - 6 cycles          | 21 | 44.4 ± 60.8 | 24 | 19.4 ± 50.9 | -25.0 (-58.6 – 8.6) | 0.141 |
| <b>Pain in chest</b>           |    |             |    |             |                     |       |
| Baseline                       | 35 | 25.7 ± 30.3 | 34 | 20.5 ± 32.8 | -5.1 (-20.3 – 10.0) | 0.503 |
| 2 cycles                       | 22 | 21.2 ± 26.3 | 30 | 19.9 ± 29.8 |                     |       |
| 4 cycles                       | 22 | 19.6 ± 22.2 | 25 | 14.6 ± 25.6 |                     |       |
| 6 cycles                       | 21 | 17.4 ± 27.1 | 25 | 21.3 ± 27.0 | 3.8 (-12.2 – 20.0)  | 0.631 |
| P Baseline - 6 cycles          |    | 0.693       |    | 0.307       |                     |       |
| Δ Baseline - 6 cycles          | 21 | -3.1 ± 36.3 | 25 | 6.6 ± 31.9  | 9.8 (-10.4 – 30.1)  | 0.334 |
| <b>Pain in arm or shoulder</b> |    |             |    |             |                     |       |
| Baseline                       | 34 | 19.6 ± 23.3 | 34 | 24.5 ± 27.5 | 4.9 (-7.4 – 17.2)   | 0.432 |
| 2 cycles                       | 23 | 20.2 ± 27.9 | 30 | 8.8 ± 21.3  |                     |       |
| 4 cycles                       | 22 | 16.6 ± 24.6 | 26 | 11.5 ± 20.9 |                     |       |
| 6 cycles                       | 21 | 26.9 ± 27.1 | 25 | 22.6 ± 28.4 | -4.3 (-20.9 – 12.2) | 0.603 |

|                            |    |             |    |             |                     |       |
|----------------------------|----|-------------|----|-------------|---------------------|-------|
| P Baseline - 6 cycles      |    | 0.110       |    | 0.840       |                     |       |
| Δ Baseline - 6 cycles      | 21 | 11.1 ± 30.4 | 25 | 1.3 ± 32.6  | -9.7 (-28.6 – 9.0)  | 0.302 |
| <b>Pain in other parts</b> |    |             |    |             |                     |       |
| Baseline                   | 35 | 29.5 ± 25.2 | 33 | 32.3 ± 24.2 | 2.7 (-9.2 – 14.8)   | 0.643 |
| 2 cycles                   | 21 | 23.8 ± 21.4 | 28 | 26.1 ± 18.9 |                     |       |
| 4 cycles                   | 21 | 28.5 ± 24.2 | 24 | 22.2 ± 16.0 |                     |       |
| 6 cycles                   | 20 | 24.9 ± 21.2 | 23 | 24.6 ± 20.6 | -0.3 (-13.2 – 12.5) | 0.955 |
| P Baseline - 6 cycles      |    | 0.825       |    | 0.110       |                     |       |
| Δ Baseline - 6 cycles      | 20 | -1.6 ± 33.2 | 23 | -8.6 ± 25.0 | -7.0 (-25.0 – 10.9) | 0.435 |

**Supplementary Table 4.** Health-related quality of life among patients with depression at baseline

| Health related quality of life | n  | C<br>(mean ± DE) | n  | EPC<br>(mean ± DE) | Mean difference<br>(95% CI) | p<br>(t student) |
|--------------------------------|----|------------------|----|--------------------|-----------------------------|------------------|
| <b>Global health status</b>    |    |                  |    |                    |                             |                  |
| Baseline                       | 23 | 40.2 ± 27.0      | 24 | 42.0 ± 20.0        | 1.7 (-12.1 – 15.7)          | 0.796            |
| 2 cycles                       | 14 | 60.1 ± 21.4      | 12 | 48.6 ± 23.5        |                             |                  |
| 4 cycles                       | 11 | 52.2 ± 26.8      | 13 | 57.6 ± 18.4        |                             |                  |
| 6 cycles                       | 9  | 54.6 ± 27.0      | 11 | 50.7 ± 27.7        | -3.8 (-29.7 – 22.0)         | 0.757            |
| P Baseline - 6 cycles          |    | 0.071            |    | 0.945              |                             |                  |
| Δ Baseline - 6 cycles          | 9  | 24.0 ± 34.7      | 11 | 0.7 ± 35.2         | -23.3 (-56.3 – 9.7)         | 0.156            |
| <b>Physical functioning</b>    |    |                  |    |                    |                             |                  |
| Baseline                       | 23 | 47.2 ± 28.9      | 24 | 52.2 ± 23.2        | 4.9 (-10.4 – 20.3)          | 0.519            |
| 2 cycles                       | 14 | 62.8 ± 27.6      | 14 | 57.6 ± 22.2        |                             |                  |
| 4 cycles                       | 11 | 64.8 ± 25.4      | 13 | 54.3 ± 19.5        |                             |                  |
| 6 cycles                       | 9  | 62.2 ± 30.5      | 11 | 40.6 ± 31.3        | -21.6 (-50.8 – 7.6)         | 0.138            |
| P Baseline - 6 cycles          |    | 0.907            |    | 0.171              |                             |                  |
| Δ Baseline - 6 cycles          | 9  | 0.7 ± 18.3       | 11 | -15.7 ± 35.4       | -16.4 (-43.9 – 11.0)        | 0.224            |

|                              |    |              |    |             |                      |       |
|------------------------------|----|--------------|----|-------------|----------------------|-------|
| <b>Role functioning</b>      |    |              |    |             |                      |       |
| Baseline                     | 23 | 39.1 ± 39.1  | 24 | 42.3 ± 29.4 | 3.2 (-17.0 – 23.5)   | 0.750 |
| 2 cycles                     | 14 | 60.7 ± 40.0  | 14 | 47.6 ± 30.5 |                      |       |
| 4 cycles                     | 11 | 56.0 ± 34.3  | 13 | 51.2 ± 39.9 |                      |       |
| 6 cycles                     | 9  | 55.5 ± 35.3  | 11 | 48.4 ± 35.3 | -7.0 (-40.4 – 26.2)  | 0.662 |
| P Baseline - 6 cycles        |    | 0.738        |    | 0.896       |                      |       |
| Δ Baseline - 6 cycles        | 8  | -16.6 ± 12.5 | 10 | -6.6 ± 55.1 | 10.0 (-32.3 – 52.3)  | 0.624 |
| <b>Emotional functioning</b> |    |              |    |             |                      |       |
| Baseline                     | 22 | 44.3 ± 28.2  | 24 | 59.3 ± 22.2 | 15.0 (0.0 – 30.1)    | 0.050 |
| 2 cycles                     | 14 | 71.4 ± 29.1  | 12 | 72.2 ± 24.4 |                      |       |
| 4 cycles                     | 11 | 67.4 ± 19.5  | 13 | 76.2 ± 16.2 |                      |       |
| 6 cycles                     | 9  | 61.1 ± 33.3  | 11 | 59.8 ± 24.9 | -1.2 (-28.6 – 26.1)  | 0.924 |
| P Baseline - 6 cycles        |    | 0.198        |    | 0.305       |                      |       |
| Δ Baseline - 6 cycles        | 9  | 14.8 ± 31.6  | 11 | -8.3 ± 25.5 | -23.1 (-49.9 – 3.7)  | 0.087 |
| <b>Cognitive functioning</b> |    |              |    |             |                      |       |
| Baseline                     | 23 | 55.7 ± 35.7  | 24 | 72.9 ± 23.9 | 17.1 (-0.9 – 35.1)   | 0.062 |
| 2 cycles                     | 14 | 69.0 ± 28.3  | 12 | 84.7 ± 18.0 |                      |       |
| 4 cycles                     | 11 | 69.6 ± 23.3  | 13 | 74.3 ± 24.1 |                      |       |
| 6 cycles                     | 9  | 70.3 ± 34.1  | 11 | 69.6 ± 37.8 | -0.6 (-34.9 – 33.5)  | 0.967 |
| P Baseline - 6 cycles        |    | 0.198        |    | 0.684       |                      |       |
| Δ Baseline - 6 cycles        | 9  | 14.8 ± 31.6  | 11 | -6.0 ± 47.8 | -20.8 (-60.0 – 18.2) | 0.277 |
| <b>Social functioning</b>    |    |              |    |             |                      |       |
| Baseline                     | 23 | 52.8 ± 37.8  | 24 | 53.4 ± 34.0 | 0.5 (-20.5 – 21.6)   | 0.957 |
| 2 cycles                     | 14 | 55.9 ± 33.0  | 12 | 62.4 ± 37.0 |                      |       |
| 4 cycles                     | 11 | 53.0 ± 23.3  | 13 | 46.1 ± 34.1 |                      |       |
| 6 cycles                     | 9  | 61.1 ± 33.3  | 11 | 59.0 ± 39.6 | -2.0 (-36.9 – 32.9)  | 0.905 |
| P Baseline - 6 cycles        |    | 0.773        |    | 0.769       |                      |       |
| Δ Baseline - 6 cycles        | 9  | 5.5 ± 55.9   | 11 | -4.5 ± 50.0 | -10.1 (-59.8 – 39.6) | 0.675 |

|                       |    |              |    |              |                        |              |
|-----------------------|----|--------------|----|--------------|------------------------|--------------|
| Fatigue               |    |              |    |              |                        |              |
| Baseline              | 23 | 61.8 ± 26.7  | 24 | 60.1 ± 22.2  | -1.6 (-16.0 – 12.7)    | 0.819        |
| 2 cycles              | 14 | 46.8 ± 31.4  | 14 | 49.2 ± 26.7  |                        |              |
| 4 cycles              | 11 | 42.4 ± 25.2  | 13 | 47.0 ± 18.2  |                        |              |
| 6 cycles              | 9  | 40.7 ± 28.3  | 11 | 59.5 ± 33.0  | 18.8 (-10.4 – 48.1)    | 0.193        |
| P Baseline - 6 cycles |    | 0.170        |    | 0.922        |                        |              |
| Δ Baseline - 6 cycles | 9  | -16.0 ± 31.9 | 11 | 1.0 ± 33.1   | 17.0 (-13.7 – 47.8)    | 0.260        |
| Nausea and vomiting   |    |              |    |              |                        |              |
| Baseline              | 22 | 39.3 ± 35.8  | 23 | 19.5 ± 19.8  | -19.8 (-37.5 – (-2.1)) | 0.029        |
| 2 cycles              | 14 | 35.7 ± 31.2  | 14 | 23.8 ± 24.2  |                        |              |
| 4 cycles              | 11 | 18.1 ± 26.3  | 13 | 28.2 ± 26.6  |                        |              |
| 6 cycles              | 9  | 35.1 ± 39.4  | 11 | 18.1 ± 21.6  | -17.0 (-46.1 – 12.1)   | 0.068        |
| P Baseline - 6 cycles |    | 0.479        |    | 0.440        |                        |              |
| Δ Baseline - 6 cycles | 9  | -9.2 ± 37.3  | 11 | -6.0 ± 25.0  | 3.1 (-26.1 – 32.5)     | 0.822        |
| Pain                  |    |              |    |              |                        |              |
| Baseline              | 23 | 52.1 ± 35.2  | 24 | 43.0 ± 29.8  | -9.1 (-28.2 – 10.0)    | 0.343        |
| 2 cycles              | 14 | 51.1 ± 32.3  | 13 | 33.3 ± 22.5  |                        |              |
| 4 cycles              | 11 | 34.8 ± 21.6  | 13 | 33.3 ± 30.4  |                        |              |
| 6 cycles              | 9  | 48.1 ± 29.3  | 11 | 28.7 ± 27.9  | -19.3 (-46.3 – 7.6)    | 0.150        |
| P Baseline - 6 cycles |    | 0.211        |    | 0.120        |                        |              |
| Δ Baseline - 6 cycles | 9  | 12.9 ± 28.6  | 11 | -16.6 ± 32.4 | -29.6 (-58.7 – 0.5)    | <b>0.046</b> |
| Dyspnea               |    |              |    |              |                        |              |
| Baseline              | 21 | 49.2 ± 40.3  | 24 | 37.4 ± 29.9  | -11.7 (-32.8 – 9.4)    | 0.271        |
| 2 cycles              | 14 | 26.1 ± 39.6  | 14 | 35.7 ± 33.2  |                        |              |
| 4 cycles              | 11 | 9.0 ± 15.5   | 13 | 30.7 ± 31.8  |                        |              |
| 6 cycles              | 9  | 14.8 ± 33.7  | 11 | 36.3 ± 37.8  | 21.5 (-12.5 – 55.6)    | 0.201        |
| P Baseline - 6 cycles |    | 0.080        |    | 0.999        |                        |              |
| Δ Baseline - 6 cycles | 8  | -24.9 ± 34.5 | 11 | 0 ± 29.8     | 24.9 (-6.2 – 56.2)     | 0.109        |



|                       |    |              |    |              |                      |       |
|-----------------------|----|--------------|----|--------------|----------------------|-------|
| <b>Insomnia</b>       |    |              |    |              |                      |       |
| Baseline              | 23 | 52.1 ± 38.6  | 24 | 52.7 ± 30.9  | 0.6 (-19.9 – 21.1)   | 0.953 |
| 2 cycles              | 14 | 35.7 ± 38.0  | 14 | 42.8 ± 27.5  |                      |       |
| 4 cycles              | 11 | 30.3 ± 31.4  | 13 | 30.7 ± 21.3  |                      |       |
| 6 cycles              | 9  | 37.0 ± 30.9  | 11 | 33.3 ± 21.0  | -3.7 (-28.1 – 20.7)  | 0.754 |
| P Baseline - 6 cycles |    | 0.799        |    | 0.046        |                      |       |
| Δ Baseline - 6 cycles | 9  | -3.7 ± 42.3  | 11 | -21.2 ± 30.8 | -17.5 (-51.8 – 16.8) | 0.298 |
| <b>Appetite loss</b>  |    |              |    |              |                      |       |
| Baseline              | 22 | 57.5 ± 34.3  | 24 | 50 ± 29.4    | -7.5 (-26.5 – 11.4)  | 0.426 |
| 2 cycles              | 14 | 28.5 ± 34.2  | 14 | 57.1 ± 33.1  |                      |       |
| 4 cycles              | 11 | 45.4 ± 34.2  | 13 | 43.5 ± 31.5  |                      |       |
| 6 cycles              | 9  | 51.8 ± 37.6  | 11 | 45.4 ± 34.2  | -6.3 (-40.2 – 27.4)  | 0.696 |
| P Baseline - 6 cycles |    | 0.708        |    | 0.846        |                      |       |
| Δ Baseline - 6 cycles | 9  | 7.4 ± 57.1   | 11 | 3.0 ± 50.4   | -4.3 (-54.9 – 46.1)  | 0.858 |
| <b>Constipation</b>   |    |              |    |              |                      |       |
| Baseline              | 23 | 27.5 ± 31.2  | 24 | 27.7 ± 27.2  | 0.2 (-16.9 – 17.4)   | 0.977 |
| 2 cycles              | 14 | 42.8 ± 37.9  | 14 | 38.0 ± 34.2  |                      |       |
| 4 cycles              | 11 | 21.2 ± 26.9  | 13 | 35.8 ± 28.7  |                      |       |
| 6 cycles              | 9  | 29.6 ± 35.1  | 11 | 21.2 ± 26.9  | -8.4 (-37.5 – 20.7)  | 0.552 |
| P Baseline - 6 cycles |    | 0.999        |    | 0.999        |                      |       |
| Δ Baseline - 6 cycles | 9  | 0 ± 40.8     | 11 | 0 ± 33.3     | 0 (-34.7 – 34.7)     | 0.999 |
| <b>Diarrhea</b>       |    |              |    |              |                      |       |
| Baseline              | 22 | 21.2 ± 33.4  | 24 | 12.4 ± 23.6  | -8.7 (-25.8 – 8.3)   | 0.310 |
| 2 cycles              | 14 | 19.0 ± 31.2  | 12 | 8.3 ± 15.0   |                      |       |
| 4 cycles              | 11 | 12.1 ± 16.8  | 13 | 10.2 ± 16.0  |                      |       |
| 6 cycles              | 9  | 11.1 ± 23.5  | 11 | 18.1 ± 22.9  | 7.0 (-14.8 – 28.9)   | 0.507 |
| P Baseline - 6 cycles |    | 0.141        |    | 0.821        |                      |       |
| Δ Baseline - 6 cycles | 9  | -22.2 ± 40.8 | 11 | 3.0 ± 43.3   | 25.2 (-14.6 – 65.1)  | 0.200 |

|                               |    |              |    |              |                     |       |
|-------------------------------|----|--------------|----|--------------|---------------------|-------|
| <b>Financial difficulties</b> |    |              |    |              |                     |       |
| Baseline                      | 23 | 62.3 ± 35.2  | 24 | 59.7 ± 36.7  | -2.5 (-23.7 – 18.5) | 0.806 |
| 2 cycles                      | 14 | 69.0 ± 24.3  | 11 | 66.6 ± 33.3  |                     |       |
| 4 cycles                      | 11 | 72.7 ± 25.0  | 13 | 61.5 ± 35.6  |                     |       |
| 6 cycles                      | 9  | 66.6 ± 33.3  | 11 | 75.7 ± 33.6  | 9.0 (-22.5 – 40.7)  | 0.554 |
| P Baseline - 6 cycles         |    | 0.512        |    | 0.588        |                     |       |
| Δ Baseline - 6 cycles         | 9  | 7.4 ± 32.3   | 11 | 6.0 ± 35.9   | -1.3 (-33.8 – 31.5) | 0.932 |
| <b>Dyspnea 2</b>              |    |              |    |              |                     |       |
| Baseline                      | 22 | 35.3 ± 23.9  | 23 | 39.1 ± 28.2  | 3.7 (-11.9 – 19.5)  | 0.631 |
| 2 cycles                      | 14 | 24.6 ± 25.8  | 14 | 36.5 ± 28.3  |                     |       |
| 4 cycles                      | 11 | 16.1 ± 20.7  | 12 | 33.3 ± 25.9  |                     |       |
| 6 cycles                      | 9  | 23.4 ± 32.6  | 11 | 32.3 ± 32.7  | 8.8 (-22.0 – 39.7)  | 0.554 |
| P Baseline - 6 cycles         |    | 0.384        |    | 0.650        |                     |       |
| Δ Baseline - 6 cycles         | 9  | -6.1 ± 20.1  | 11 | -4.0 ± 28.6  | 2.1 (-21.6 – 25.9)  | 0.853 |
| <b>Coughing</b>               |    |              |    |              |                     |       |
| Baseline                      | 22 | 59.0 ± 32.4  | 23 | 47.8 ± 33.0  | -11.2 (-30.9 – 8.4) | 0.255 |
| 2 cycles                      | 14 | 35.7 ± 33.2  | 14 | 35.7 ± 30.5  |                     |       |
| 4 cycles                      | 11 | 33.3 ± 21.0  | 12 | 30.5 ± 22.2  |                     |       |
| 6 cycles                      | 9  | 33.3 ± 28.8  | 11 | 24.2 ± 26.2  | -9.0 (-34.9 – 16.8) | 0.470 |
| P Baseline - 6 cycles         |    | 0.051        |    | 0.132        |                     |       |
| Δ Baseline - 6 cycles         | 9  | -18.5 ± 24.2 | 11 | -21.2 ± 42.8 | -2.6 (-36.5 – 31.1) | 0.869 |
| <b>Haemoptysis</b>            |    |              |    |              |                     |       |
| Baseline                      | 22 | 19.6 ± 31.9  | 23 | 5.7 ± 16.3   | -13.8 (-29.0 – 1.2) | 0.072 |
| 2 cycles                      | 14 | 2.3 ± 8.9    | 14 | 2.3 ± 8.9    |                     |       |
| 4 cycles                      | 11 | 3.0 ± 10.0   | 12 | 2.7 ± 9.6    |                     |       |
| 6 cycles                      | 9  | 7.4 ± 22.2   | 11 | 0 ± 0        | -7.4 (-24.4 – 9.6)  | 0.347 |
| P Baseline - 6 cycles         |    | 0.559        |    | 0.192        |                     |       |
| Δ Baseline - 6 cycles         | 9  | -7.4 ± 36.4  | 11 | -9.0 ± 21.5  | -1.6 (-29.1 – 25.8) | 0.899 |

|                              |    |              |    |             |                      |       |
|------------------------------|----|--------------|----|-------------|----------------------|-------|
| <b>Sore mouth</b>            |    |              |    |             |                      |       |
| Baseline                     | 22 | 12.1 ± 26.3  | 23 | 15.9 ± 31.5 | 3.8 (-13.6 – 21.3)   | 0.662 |
| 2 cycles                     | 14 | 14.2 ± 31.2  | 14 | 11.9 ± 16.5 |                      |       |
| 4 cycles                     | 11 | 0.0 ± 0      | 12 | 13.8 ± 22.2 |                      |       |
| 6 cycles                     | 9  | 11.1 ± 16.6  | 11 | 12.1 ± 22.4 | 1.0 (-17.9 – 19.9)   | 0.912 |
| P Baseline - 6 cycles        |    | 0.512        |    | 0.506       |                      |       |
| Δ Baseline - 6 cycles        | 9  | -7.4 ± 32.3  | 11 | -6.0 ± 29.1 | 1.3 (-27.5 – 30.2)   | 0.923 |
| <b>Dysphagia</b>             |    |              |    |             |                      |       |
| Baseline                     | 22 | 34.8 ± 37.7  | 23 | 17.3 ± 24.3 | -17.4 (-36.4 – 1.5)  | 0.071 |
| 2 cycles                     | 14 | 23.8 ± 37.9  | 14 | 23.8 ± 30.4 |                      |       |
| 4 cycles                     | 11 | 9.0 ± 15.5   | 12 | 22.2 ± 32.8 |                      |       |
| 6 cycles                     | 9  | 7.4 ± 14.6   | 11 | 24.2 ± 30.1 | 16.8 (-6.3 – 39.9)   | 0.144 |
| P Baseline - 6 cycles        |    | 0.088        |    | 0.999       |                      |       |
| Δ Baseline - 6 cycles        | 9  | -25.9 ± 40.0 | 11 | -0.0 ± 49.4 | 25.9 (-17.0 – 68.9)  | 0.221 |
| <b>Peripheral neuropathy</b> |    |              |    |             |                      |       |
| Baseline                     | 22 | 30.3 ± 32.3  | 23 | 17.3 ± 31.5 | -12.9 (-32.1 – 6.3)  | 0.183 |
| 2 cycles                     | 14 | 38.0 ± 38.9  | 13 | 17.9 ± 25.8 |                      |       |
| 4 cycles                     | 11 | 42.4 ± 39.6  | 12 | 38.8 ± 39.7 |                      |       |
| 6 cycles                     | 9  | 37.0 ± 42.3  | 11 | 48.4 ± 43.1 | 11.1 (-28.9 – 51.8)  | 0.559 |
| P Baseline - 6 cycles        |    | 0.760        |    | 0.025       |                      |       |
| Δ Baseline - 6 cycles        | 9  | 3.7 ± 35.1   | 11 | 36.3 ± 45.8 | 32.6 (-6.4 – 71.7)   | 0.096 |
| <b>Alopecia</b>              |    |              |    |             |                      |       |
| Baseline                     | 22 | 31.8 ± 45.3  | 23 | 20.2 ± 31.3 | -11.5 (-35.1 – 12.1) | 0.330 |
| 2 cycles                     | 14 | 61.9 ± 41.0  | 14 | 52.3 ± 44.7 |                      |       |
| 4 cycles                     | 11 | 69.6 ± 34.8  | 12 | 63.8 ± 38.8 |                      |       |
| 6 cycles                     | 9  | 62.9 ± 42.3  | 11 | 48.4 ± 45.6 | -14.4 (-56.1 – 27.2) | 0.475 |
| P Baseline - 6 cycles        |    | 0.174        |    | 0.152       |                      |       |
| Δ Baseline - 6 cycles        | 9  | 25.9 ± 52.1  | 11 | 24.2 ± 51.8 | -1.6 (-50.7 – 47.3)  | 0.943 |

| Pain in chest           |    |              |    |             |                     |       |
|-------------------------|----|--------------|----|-------------|---------------------|-------|
| Baseline                | 22 | 37.8 ± 34.5  | 23 | 27.5 ± 29.5 | -10.3 (-29.6 – 8.9) | 0.286 |
| 2 cycles                | 14 | 33.3 ± 34.5  | 13 | 25.6 ± 30.8 |                     |       |
| 4 cycles                | 11 | 21.2 ± 22.4  | 12 | 33.3 ± 20.1 |                     |       |
| 6 cycles                | 9  | 22.2 ± 37.2  | 11 | 21.2 ± 22.4 | -1.0 (-29.3 – 27.2) | 0.941 |
| P Baseline - 6 cycles   |    | 0.081        |    | 0.506       |                     |       |
| Δ Baseline - 6 cycles   | 9  | -11.1 ± 16.6 | 11 | -6.0 ± 29.1 | 5.0 (-17.9 – 28.0)  | 0.651 |
| Pain in arm or shoulder |    |              |    |             |                     |       |
| Baseline                | 22 | 33.3 ± 38.4  | 23 | 26.0 ± 28.3 | -7.2 (-27.5 – 13.0) | 0.475 |
| 2 cycles                | 14 | 33.3 ± 43.3  | 14 | 26.1 ± 35.0 |                     |       |
| 4 cycles                | 11 | 24.2 ± 21.5  | 12 | 27.7 ± 37.1 |                     |       |
| 6 cycles                | 9  | 33.3 ± 33.3  | 11 | 39.3 ± 29.1 | 6.0 (-23.2 – 35.3)  | 0.669 |
| P Baseline - 6 cycles   |    | 0.195        |    | 0.341       |                     |       |
| Δ Baseline - 6 cycles   | 9  | 11.1 ± 23.5  | 11 | 12.1 ± 40.2 | 1.0 (-30.9 – 32.9)  | 0.948 |
| Pain in other parts     |    |              |    |             |                     |       |
| Baseline                | 22 | 27.2 ± 19.6  | 23 | 23.1 ± 25.4 | -4.0 (-17.8 – 9.6)  | 0.551 |
| 2 cycles                | 14 | 33.3 ± 29.2  | 14 | 21.4 ± 16.5 |                     |       |
| 4 cycles                | 11 | 21.2 ± 16.8  | 12 | 27.7 ± 23.9 |                     |       |
| 6 cycles                | 9  | 22.2 ± 16.6  | 11 | 30.3 ± 10.0 | 8.0 (-5.6 – 21.7)   | 0.225 |
| P Baseline - 6 cycles   |    | 0.999        |    | 0.104       |                     |       |
| Δ Baseline - 6 cycles   | 9  | 0 ± 23.5     | 11 | 12.1 ± 22.4 | 12.1 (-9.5 – 33.8)  | 0.256 |

**Supplementary Table 5.** Anxiety and Depression according to the HADS scale throughout study duration.

| Health related quality of life | Baseline  | 2 cycles     | p     | 4 cycles  | p     | 6 cycles     | p     |
|--------------------------------|-----------|--------------|-------|-----------|-------|--------------|-------|
| Anxiety                        |           |              |       |           |       |              |       |
| EPC                            | 6 (4 – 9) | 6 (2.5 – 9-) | 0.825 | 6 (3 – 9) | 0.559 | 7 (3 – 9.75) | 0.744 |

|            |              |              |       |            |       |              |       |
|------------|--------------|--------------|-------|------------|-------|--------------|-------|
| C          | 7 (4 – 12)   | 6 (2.5 – 9)  | 0.031 | 6 (3 – 10) | 0.578 | 6 (4 – 9)    | 0.437 |
| Depression | 0.086        | 0.494        |       | 0.539      |       | 0.763        |       |
| EPC        | 6 (3 – 9)    | 6 (2 – 8.25) | 0.409 | 7 (5 – 9)  | 0.032 | 6 (3 – 9)    | 0.195 |
| C          | 7 (4 – 10.2) | 7 (4 – 10)   | 0.476 | 7 (5 – 10) | 0.610 | 8 (3.2 – 10) | 0.555 |
|            | 0.046        | 0.150        |       | 0.857      |       | 0.173        |       |
